# Supplementary material for: Structural insights into heterohexameric assembly of epilepsy-related ligand–receptor complex LGI1–ADAM22
Source: eLife journal article supplement (doi:10.7554/elife.105918), 2025-03-12
Supplement: fig1-figsupp1-data2 [file elife-105918-fig1-figsupp1-data2-v1.pdf]

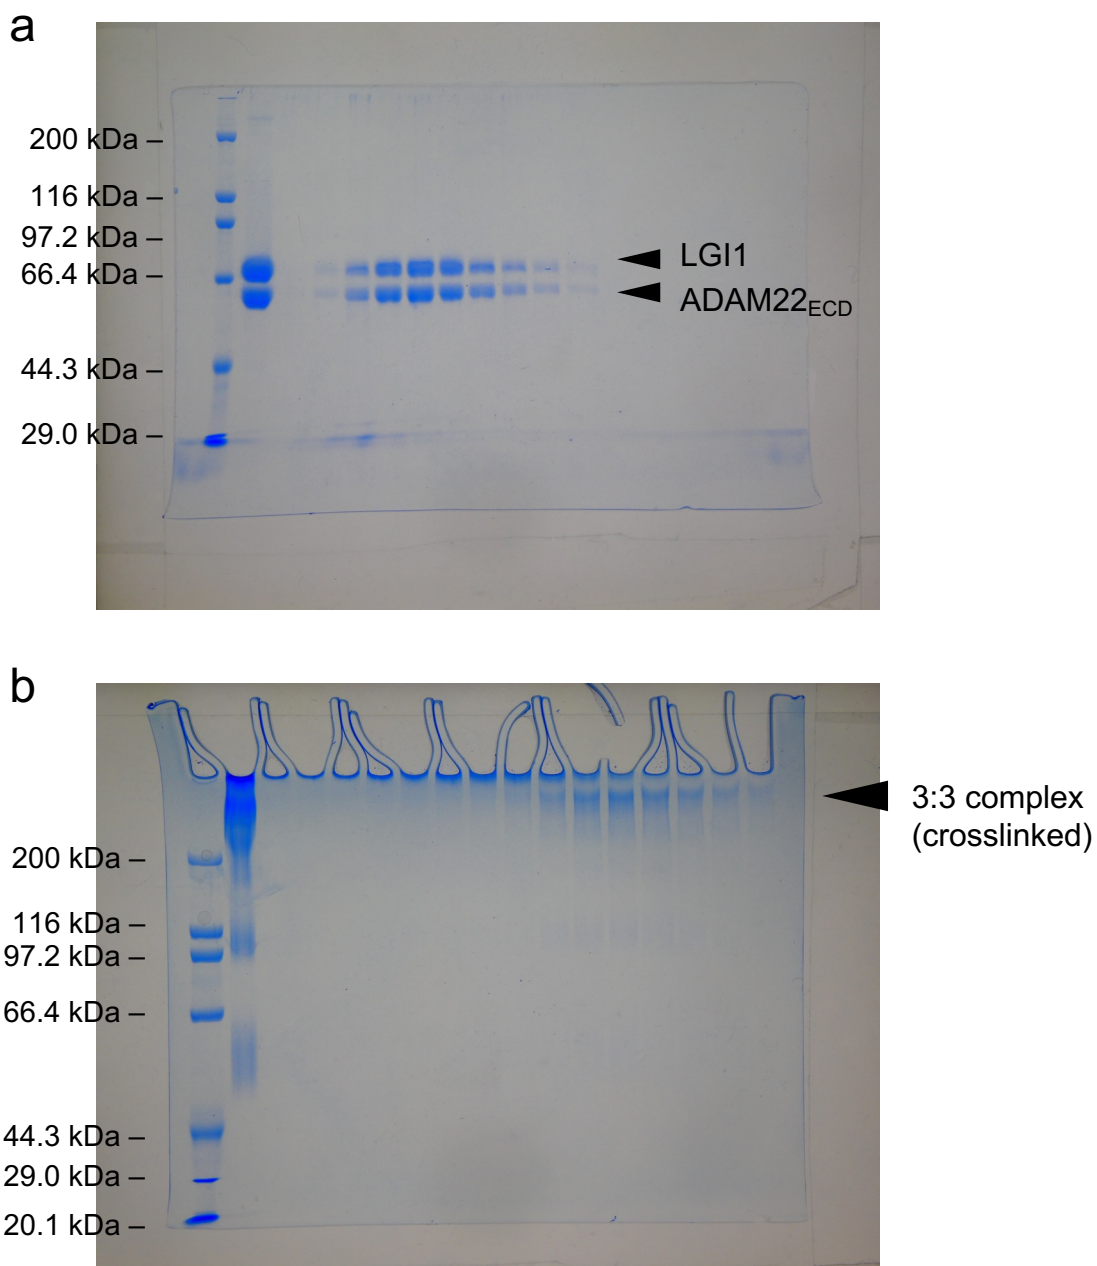

**Figure 1–figure supplement 1–source data 2. Uncropped images of SDS-PAGE gels for Figure 1–figure supplement 1, indicating the relevant bands.**

**a** Uncropped image of the CBB-stained SDS-PAGE gel displayed in Figure 1–figure supplement 1b.

**b** Uncropped image of the CBB-stained SDS-PAGE gel displayed in Figure 1–figure supplement 1d.
